# Supplementary material for: Prevention of oral mucositis with cryotherapy in children undergoing hematopoietic stem cell transplantations—a feasibility study and randomized controlled trial
Source: PubMed Central journal article supplement (PMC7447624; doi:10.1007/s00520-019-05258-2), 2020-01-28
Supplement: 520_2019_5258_MOESM1_ESM.pdf [file 520_2019_5258_MOESM1_ESM.pdf]

## Online Recourse 1

Prevention of oral mucositis with cryotherapy in children undergoing hematopoietic stem cell transplantations-a randomized controlled trial.

### Supportive Care in Cancer

Tove Kamsvåg, Annacarin Svanberg, Karin Garming-Legert, Johan Arvidson, Louise von Essen, Karin Mellgren, Jacek Toporski, Jacek Winiarski, Gustaf Ljungman.  
Department of women's and children's Health, Pediatric oncology, Uppsala University, Sweden. Tove.kamsvag\_magnusson@kbh.uu.se

| Question                                                                                                             | Response alternatives                                                                                       |
|----------------------------------------------------------------------------------------------------------------------|-------------------------------------------------------------------------------------------------------------|
| <b>1</b> For how long during your chemotherapy infusion or the time instructed by the nurse did you cool your mouth? | All the time    More than half of the time    Less than half of the time    Not at all                      |
| <b>1.1</b> If not all the time, why did you not cool your mouth?                                                     | I forgot    It was unpleasant    I was sleeping    I didn't know I was supposed to    Other, please specify |
| <b>2</b> Was it unpleasant for you to cool your mouth?                                                               | No, not at all    No, almost not at all    Yes, a little    Yes, very <sup>a</sup>                          |
| <b>2.1</b> In which way was it unpleasant to cool your mouth?                                                        | It was cold    It tasted bad    My mouth or teeth hurt    I got a headache    Other, please specify         |
| <b>3</b> Did the oral cryotherapy prevent you from doing other things during the therapy?                            | No, not at all    No, almost not at all    Yes, a little    Yes, very                                       |
| <b>3.1</b> If yes, what were you not able to do?                                                                     | Open question                                                                                               |

<sup>a</sup> Children who responded "yes, very" to question two were in the analysis considered to experience considerable discomfort of OC.

Online Recourse 1: *Oral cryotherapy evaluation questionnaire. The questionnaire was answered each day of chemotherapy/oral cryotherapy.*
