# Supplementary material for: Prevention of oral mucositis with cryotherapy in children undergoing hematopoietic stem cell transplantations—a feasibility study and randomized controlled trial
Source: PubMed Central journal article supplement (PMC7447624; doi:10.1007/s00520-019-05258-2), 2020-01-28
Supplement: 520_2019_5258_MOESM2_ESM.pdf [file 520_2019_5258_MOESM2_ESM.pdf]

## Online Recourse 2

Prevention of oral mucositis with cryotherapy in children undergoing hematopoietic stem cell transplantations-a randomized controlled trial.

### Supportive Care in Cancer

Tove Kamsvåg, Annacarin Svanberg, Karin Garming-Legert, Johan Arvidson, Louise von Essen, Karin Mellgren, Jacek Toporski, Jacek Winiarski, Gustaf Ljungman.

Department of women's and children's Health, Pediatric oncology, Uppsala University, Sweden.

[Tove.kamsvag\\_magnusson@kbh.uu.se](mailto:Tove.kamsvag_magnusson@kbh.uu.se)

| Conditioning regimen                   | Oral cryotherapy | Control | Total |
|----------------------------------------|------------------|---------|-------|
| <i>TBI/Etoposide/Cy</i>                | 9                | 5       | 14    |
| <i>TBI/Fludarabine/Cy</i>              | 0                | 1       | 1     |
| <i>BEAC</i>                            | 0                | 1       | 1     |
| <i>BEAM</i>                            | 2                | 0       | 2     |
| <i>Busulfan/Cy</i>                     | 1                | 3       | 4     |
| <i>Busulfan/Fludarabine</i>            | 6                | 3       | 9     |
| <i>Busulfan/Melphalan</i>              | 4                | 2       | 6     |
| <i>Busulfan/Melphalan/Fludarabine</i>  | 1                | 0       | 1     |
| <i>Fludarabine/Melphalan</i>           | 0                | 1       | 1     |
| <i>Fludarabine/Cy</i>                  | 2                | 0       | 2     |
| <i>Treosulfan/Fludarabine/Thiotepa</i> | 1                | 3       | 4     |
| <i>Cy</i>                              | 2                | 1       | 5     |
| <i>Carmustine/Thiotepa/Etoposide</i>   | 0                | 1       | 1     |
| <i>ATG</i>                             | 12               | 11      | 23    |

TBI-Total Body Irradiation, Cy-Cyclophosphamide, BEAM- Carmustine/Etoposide/ARA-C/Melphalan, BEAC- Carmustine/Etoposide/Ara-C/Cyclophosphamide, ARA-C-cytarabine, ATG-antithymocyte globuline

Online Recourse 2: *Conditioning regimens and use of Antithymocyt globulin for the children.*
